# Supplementary material for: Lipid composition modulates the intestine digestion rate and serum lipid status of different edible oils: a combination of in vitro and in vivo studies
Source: Royal Society of Chemistry journal article supplement (doi:10.1039/c8fo01290c), 2019-01-01
Supplement: c8fo01290c1.pdf [file c8fo01290c1.pdf]

## Electronic supplementary information

### Highlights:

1. Fatty acid species and locations within TAGs molecules could affect lipid digestion rate and extent.
2. Maximum FFA release extent upon pancreatic lipase reaction: PO > RO > LINO > SO > LO.
3. Apparent FFA release constants were PO > SO ≈ RO > LO ≈ LINO during in-vitro digestion.
4. PO and LO were more prone to affect serum TG level and LDL-C: HDL-C ratio.
5. Lipids which were digested faster seemed to be more likely to affect serum lipid profiles.
6. Correlations were observed between lipid fatty acid composition and serum lipid profiles.

## Supplementary Fig. 1

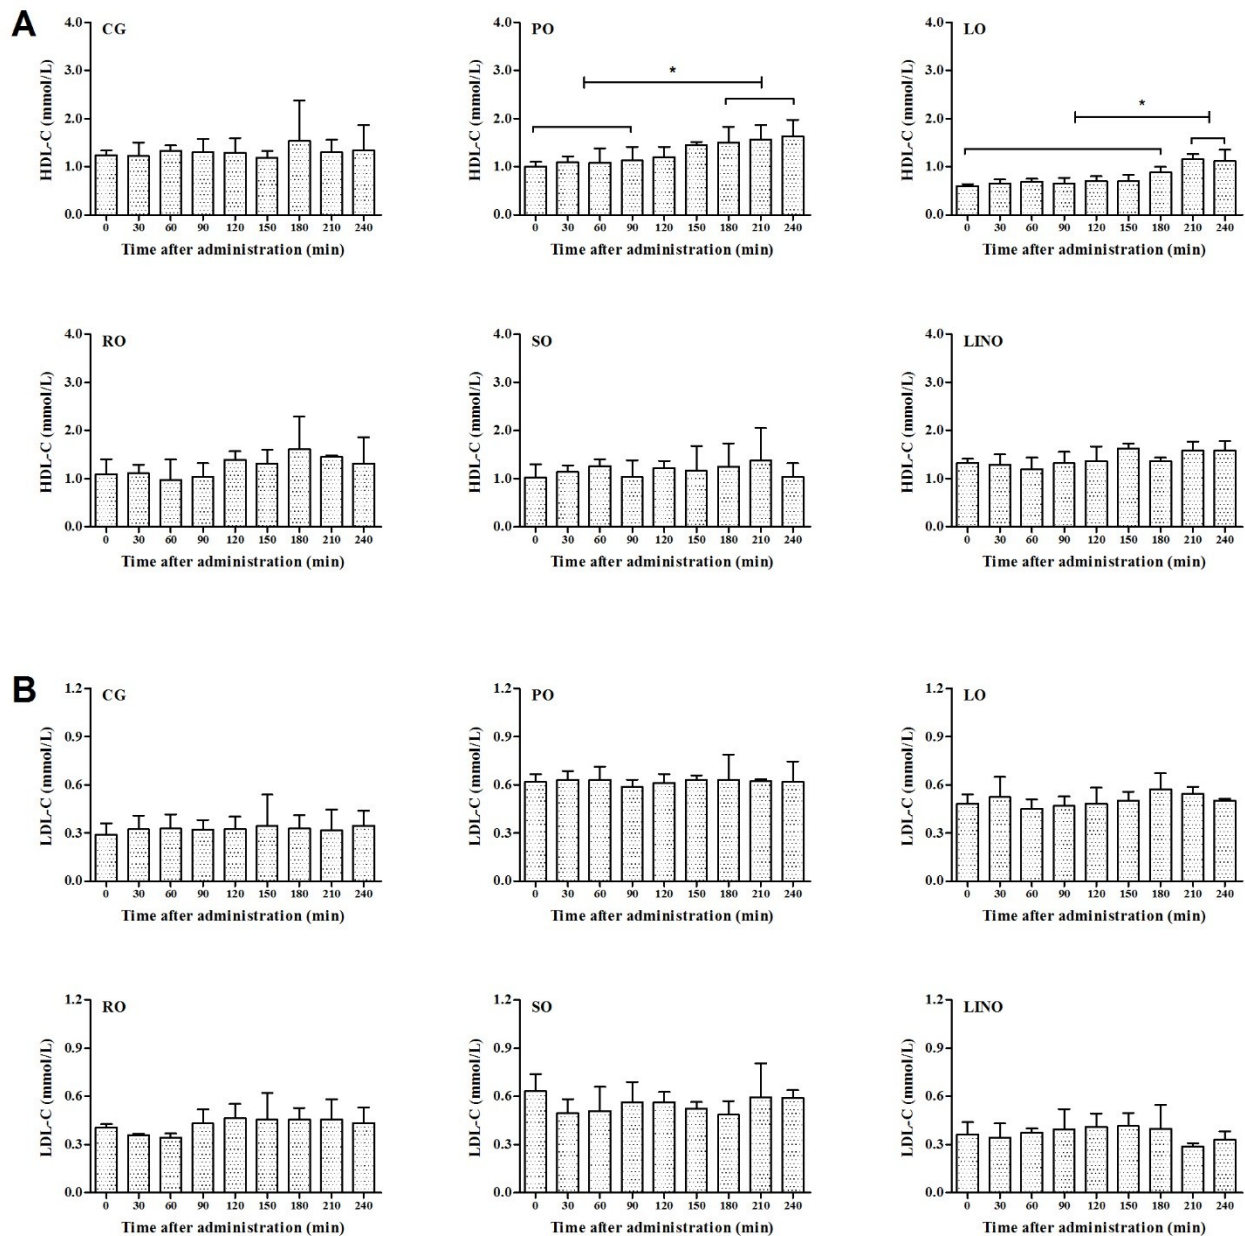

**Supplementary Fig. 1** Changes in serum HDL-C and LDL-C profiles obtained before and after gavage administration in healthy adult male SD rats. A. for serum HDL-C; B. for serum LDL-C. Error bars represent the standard deviation calculated from six independent tested sample rats. “\*” indicated significant difference ( $P < 0.05$ ) between the groups. Figures without “\*” above the bars indicated that no significant differences could be observed between groups under  $P = 0.05$ . CG, control group; PO, palm oil group; LO, lard oil group; RO, rapeseed oil group; SO, sunflower oil group; LINO, linseed oil group.
